# Supplementary material for: Disinfection Strategies of Carbapenem-resistant Klebsiella Pneumoniae in a Healthcare Facility
Source: Research Square preprint supplement (doi:10.21203/rs.3.rs-1220609/v1), 2022-01-27
Supplement: Supplementary file 1 [file db61ff069587147a7c65f7b5.docx]

**Table** **S3** The distribution of specimen types in the departments with CRKP detection

|  | ICU | Neurology/Neurosurgery | Rehabilitation | Urology/Nephrology | Hematology | Hepatopancreatobiliary |
| --- | --- | --- | --- | --- | --- | --- |
| Sputum | 37 | 11 | 10 | 0 | 1 | 2 |
| Ascites/Abdominal drainage fluid | 11 | 0 | 0 | 1 | 0 | 4 |
| Blood | 5 | 2 | 0 | 0 | 5 | 0 |
| Catheter | 3 | 0 | 0 | 0 | 2 | 0 |
| Urine | 2 | 1 | 3 | 9 | 0 | 0 |
| Wood secretion | 2 | 2 | 0 | 1 | 0 | 0 |
| Broncho-alveolar lavage | 2 | 0 | 0 | 0 | 0 | 0 |
| Stool | 0 | 0 | 0 | 0 | 3 | 0 |
| Puncture fluid | 1 | 1 | 0 | 0 | 0 | 0 |
| Bile | 1 | 0 | 0 | 0 | 0 | 4 |
| Pelvic drainage fluid | 1 | 0 | 0 | 0 | 0 | 0 |
| Pleural drainage fluid | 1 | 0 | 0 | 0 | 0 | 0 |
| Vagina secretion | 1 | 0 | 0 | 0 | 0 | 0 |
| Total | 67 | 17 | 13 | 11 | 11 | 10 |

*Note: ICU, intensive care unit.*
